# 1 Representation of contralateral visual space in the human hippocampus

2  
3 Edward H Silson<sup>1,2\*</sup>, Peter Zeidman<sup>3\*</sup>, Tomas Knapen<sup>4,5</sup> & Chris I Baker<sup>2</sup>

- 4  
5 1. Department of Psychology, University of Edinburgh, Edinburgh, UK  
6 2. Section on Learning and Plasticity, Laboratory of Brain and Cognition, National Institute  
7 of Mental Health, National Institutes of Health, Bethesda, USA.  
8  
9 3. Wellcome Centre for Human Neuroimaging, 12 Queen Square, London, WC1N 3AR, UK  
10 4. Behavioral and Movement Sciences, Vrije Universiteit Amsterdam, Amsterdam, the  
11 Netherlands  
12 5. Spinoza Centre for Neuroimaging, Royal Dutch Academy of Sciences, Amsterdam, the  
13 Netherlands

14  
15 \* equal contribution

16  
17 **Acknowledgments:** We thank Matthias Nau for thoughtful comments on the manuscript.

## 18 **Abstract**

19  
20 The initial encoding of visual information primarily from the contralateral visual field is a  
21 fundamental organizing principle of the primate visual system. Recently, the presence of such  
22 retinotopic sensitivity has been shown to extend well beyond early visual cortex to regions not  
23 historically considered retinotopically sensitive. In particular, human scene-selective regions in  
24 parahippocampal and medial parietal cortex exhibit prominent biases for the contralateral visual  
25 field. Here we used fMRI to test the hypothesis that the human hippocampus, which is thought to  
26 be anatomically connected with these scene-selective regions, would also exhibit a biased  
27 representation of contralateral visual space. First, population receptive field mapping with scene  
28 stimuli revealed strong biases for the contralateral visual field in bilateral hippocampus. Second,  
29 the distribution of retinotopic sensitivity suggested a more prominent representation in anterior  
30 medial portions of the hippocampus. Finally, the contralateral bias was confirmed in independent  
31 data taken from the Human Connectome Project initiative. The presence of contralateral biases  
32 in the hippocampus – a structure considered by many as the apex of the visual hierarchy -  
33 highlights the truly pervasive influence of retinotopy. Moreover, this finding has important  
34 implications for understanding how this information relates to the allocentric global spatial  
35 representations known to be encoded therein.

## 36 **Significance Statement**

37  
38 Retinotopic encoding of visual information is an organizing principle of visual cortex. Recent work  
39 demonstrates this sensitivity in structures far beyond early visual cortex, including those  
40 anatomically connected to the hippocampus. Here, using population receptive field modelling in  
41 two independent sets of data we demonstrate a consistent bias for the contralateral visual field in  
42 bilateral hippocampus. Such a bias highlights the truly pervasive influence of retinotopy, with  
43 important implications for understanding how the presence of retinotopy relates to more  
44 allocentric spatial representations.

## 45 **Introduction**

46 The segregation of visual information processing from the two visual fields, with biased  
47 representation of the contralateral visual field, is a fundamental feature of the human visual  
48 system (Wandell et al., 2007). Although historically considered a feature reserved for the earliest  
49 stages of visual cortex (V1-V4), recent work highlights privileged processing of contralateral space  
50 throughout the brain (Kravitz et al., 2013; Silson et al., 2015). Indeed, at least twenty separate  
51 maps of the visual field have been identified throughout cortex (Wandell et al., 2007; Swisher et

52 al., 2015) and greater contralateral sensitivity has been reported in anterior regions of ventral  
53 temporal cortex (Hemond et al., 2007; Kravitz et al., 2010; Chan et al., 2010) and the default  
54 mode network (Szinte & Knapen, 2020). Further, retinotopic maps of the contralateral visual field  
55 have been reported in the frontal eye fields (Mackey et al., 2017), the frontal lobes (Silver &  
56 Kastner, 2009) and even the cerebellum (Van Es et al., 2019). Given the seemingly ubiquitous  
57 influence of contralateral visual encoding, we asked whether the human hippocampus – a  
58 structure critical for long-term episodic memory (Scoville & Milner, 1957; Squire, 1992) and spatial  
59 navigation (O’Keefe & Nadal, 1978) among many other cognitive functions – also exhibits a  
60 contralateral bias for visual space.

61  
62 Although at first glance, the notion of retinotopic sensitivity within the hippocampus may seem  
63 surprising, there is growing evidence to suggest that such sensitivity may nonetheless exist.  
64 For example, the hierarchical model of visual processing proposed by Felleman and Van Essen  
65 places the hippocampus at the apex of the visual hierarchy (Felleman and Van Essen, 1991).  
66 More recent non-human primate models (Kravitz et al., 2011) highlight multiple visual pathways  
67 originating in primary visual cortex that converge on the hippocampus, providing multiple routes  
68 for the feed-forward encoding of retinotopic information. Functional imaging studies have  
69 confirmed many features of this model in humans (Kravitz et al., 2011; Margulies et al., 2009;  
70 Silson et al., 2015) by demonstrating the contralateral encoding of visual field position in  
71 structures thought to be anatomically connected with the hippocampus (Margulies et al., 2009).  
72 Specifically, the scene-selective Parahippocampal Place Area (PPA), located in parahippocampal  
73 gyrus (PHG) (Epstein & Kanwisher, 1998), and Medial Place Area (MPA), located in medial  
74 parietal cortex (Silson et al., 2016) both exhibit biases for contralateral visual space.

75  
76 Beyond the retinotopic nature of inputs to the hippocampus, a handful of studies provide  
77 neurophysiological support for retinotopic sensitivity in medial temporal lobe structures. For  
78 example, visually responsive cells have been recorded from the hippocampus and neighboring  
79 structures of non-human primates (Maclean et al., 1968; Desimone & Gross., 1979), and early  
80 electrophysiological recordings from the human hippocampal formation reported a pair of units  
81 with receptive fields in the contralateral upper visual field (Wilson et al., 1983). One recent fMRI  
82 study asked whether distinct regions of the hippocampus were associated with spatial memory  
83 relating to coarse-grained locations of the visual field (Jeye et al. 2018), however their focus was  
84 on memory - they did not perform retinotopic mapping or test for a main effect of visual field  
85 location, and a nuanced pattern of results was found.

86  
87 Given the evidence for retinotopically organized input, we predicted that human hippocampus  
88 would exhibit a contralateral bias during population receptive field (pRF) mapping. We tested this  
89 prediction directly, by estimating pRFs using fMRI (Dumoulin & Wandell, 2008) in a sample of  
90 individual participants (n=27). Consistent with our predictions, a significant contralateral bias was  
91 present in bilateral hippocampus at the group-level. Further, the distribution of retinotopically  
92 sensitive voxels within the hippocampus highlighted a more prominent representation in anterior  
93 and medial portions. Finally, this contralateral bias was confirmed in an independent 7.0 Tesla  
94 retinotopy data set, collected as part of Human Connectome Project initiative (Benson et al., 2018;  
95 Szinte & Knapen, 2020).

## 96 **Materials and Methods**

### 97 *Participants*

98  
99 Twenty-nine participants completed the initial fMRI experiment (21 females, mean age = 24.2  
100 years). All participants had normal or corrected to normal vision and gave written informed  
101 consent. The National Institutes of Health Institutional Review Board approved the consent and  
102

103 protocol. This work was supported by the Intramural Research program of the National Institutes  
104 of Health – National Institute of Mental Health Clinical Study Protocols 93-M-0170, NCT00001360.  
105 (A further 181 participants were included in the HCP data set, detailed below.)

106

#### 107 *fMRI scanning parameters*

108 Participants were scanned on a 3.0T GE Sigma MRI scanner using a 32-channel head coil in the  
109 Clinical Research Center on the National Institutes of Health campus (Bethesda, MD). Across all  
110 participants, whole brain coverage was acquired. Slices were orientated axially, such that the  
111 most inferior slice was below the temporal lobe. All participants completed six population receptive  
112 field mapping runs and six runs of a six category-localizer. All functional images were acquired  
113 using a BOLD-contrast sensitive standard EPI sequence (TE = 30 ms, TR = 2 s, flip-angle = 65  
114 degrees, FOV = 192 mm, acquisition matrix = 64×64, resolution 3 × 3 × 3 mm, slice gap = 0.3  
115 mm, 28 slices). A high-resolution T1 structural image was obtained for each participant (TE = 3.47  
116 ms, repetition time = 2.53 s, TI = 900 ms, flip angle = 7°, 172 slices with 1 x 1 x 1 mm voxels).

117

#### 118 *Visual Stimuli and Tasks*

##### 119 *Population receptive field mapping*

120 During pRF mapping sessions a bar aperture traversed gradually through the visual field, whilst  
121 revealing randomly selected scene fragments from 90 possible scenes. During each 36 s sweep,  
122 the aperture took 18 evenly spaced steps every 2 s (1 TR) to traverse the entire screen. Across  
123 the 18 aperture positions all 90 possible scene images were displayed once. A total of eight  
124 sweeps were made during each run (four orientations, two directions). Specifically, the bar  
125 aperture progressed in the following order for all runs: Left to Right, Bottom Right to Top Left, Top  
126 to Bottom, Bottom Left to Top Right, Right to Left, Top Left to Bottom Right, Bottom to Top, and  
127 Top Right to Bottom Left. The bar stimuli covered a circular aperture (diameter = 20° of visual  
128 angle). Participants performed a color detection task at fixation, indicating via button press when  
129 the white fixation dot changed to red. Color fixation changes occurred semi-randomly, with  
130 approximately two-color changes per sweep (Silson et al., 2015). Stimuli for this and the other in-  
131 scanner task were presented using PsychoPy software (Peirce, 2007) (RRID:SCR\_006571) from  
132 a Macbook Pro laptop (Apple Systems, Cupertino, CA).

133

##### 134 *Six category functional localizer*

135 Participants completed six functional localizer runs. During each run, color images from six  
136 stimulus categories (Scenes, Faces, Bodies, Buildings, Objects and Scrambled Objects) were  
137 presented at fixation (5 × 5° of visual angle) in 16 s blocks (20 images per block [300 ms per  
138 image, 500 ms blank]). Each category was presented twice per run, with the order of presentation  
139 counterbalanced across participants and runs. Participants responded via a MRI compatible  
140 button box whenever the same image appeared sequentially.

141

#### 142 *fMRI data processing*

##### 143 *Preprocessing*

144 All data were analyzed using the Analysis of Functional NeuroImages (AFNI) software package  
145 (Cox, 1996) (RRID:SCR\_005927). All functions and programs are readily available in the current  
146 version: AFNI binary version April 21, 2020. Before pRF and functional localizer analyses, all  
147 images for each participant were motion corrected to the first image of the first run (*3dVolreg*),  
148 after removal of the appropriate “dummy” volumes (eight) to allow stabilization of the magnetic  
149 field. Post motion-correction data were detrended (*3dDetrend*) and, in the case of the localizer  
150 data, smoothed with a 5 mm full-width at half-maximum Gaussian kernel (*3dMerge*).

151

152

153

154 *Population receptive field modelling*

155 Detailed description of the pRF model implemented in AFNI is provided elsewhere (Silson et al.,  
156 2015). Briefly, given the position of the stimulus in the visual field at every time point, the model  
157 estimates the pRF parameters that yield the best fit to the data: pRF center location (x, y), and  
158 size (diameter of the pRF). Both Simplex and Powell optimization algorithms are used  
159 simultaneously to find the best time-series/parameter sets (x, y, size) by minimizing the least-  
160 squares error of the predicted time-series with the acquired time-series for each voxel.

161  
162 *Six category functional localizer*

163 Analyses were conducted using a general linear model approach and the AFNI programs  
164 *3dDeconvolve* and *3dREMLfit*. The data at each time point were treated as the sum of all effects  
165 thought to be present at that time point and the time series was compared against a Generalized  
166 Least Square (GLSQ) model fit with REML estimation of the temporal autocorrelation structure.  
167 Specifically, a response model was built by convolving a standard gamma function with a 16 s  
168 square wave for each condition and compared against the activation time courses using GLSQ  
169 regression. Motion parameters and four polynomials accounting for slow drifts were included as  
170 regressors of no interest. To derive the response magnitude per condition, *t*-tests were performed  
171 between the condition-specific beta estimates (normalized by the grand mean of each voxel for  
172 each run) and baseline.

173  
174 *Anatomical Alignment*

175 In each participant, both the pRF and functional localizer data were first de-obliqued (*3dWarp*)  
176 before being aligned to the individual participant's high-resolution T1-weighted anatomical scan  
177 (*align\_epi\_anat.py*). Each participant's aligned data were then inspected visually to confirm  
178 alignment accuracy. Given prior work demonstrating that the collateral sulcus (Weiner et al., 2018)  
179 and the mid-fusiform sulcus (Weiner et al., 2014) provide accurate anatomical landmarks for the  
180 peak of scene-selective PPA and face-selective Fusiform Face Area (FFA; Kanwisher et al.,  
181 1997), the results of the contrast Scenes versus Faces were overlaid onto each individual  
182 participants' anatomical scan and inspected. Accurate alignment was determined using the above  
183 criteria for 27/29 participants. Subsequent analyses included only the 27 participants who met  
184 this alignment criteria.

185  
186 *Hippocampal definitions*

187 For each participant, the automated hippocampal segmentation provided by the output of  
188 Freesurfer 4 autorecon script (<http://surfer.nmr.mgh.harvard.edu/>) was used as a mask for the  
189 hippocampus. In order to divide the hippocampus into anterior, middle and posterior sections we  
190 first sorted the voxel indices by the y-axis, which codes for cortical anterior-posterior position.  
191 These indices were then separated into equal thirds and the corresponding pRF parameters were  
192 sampled for further analysis.

193  
194 *Visual field coverage and visual field biases*

195 The visual field coverage plots represent the group average sensitivity of each region of interest  
196 (ROI) to different positions in the visual field. To compute these, individual participant visual field  
197 coverage plots were first derived. These plots combine the best Gaussian receptive field model  
198 for each voxel within an ROI. Here, a max operator was used that reflects, at each point in the  
199 visual field, the maximum value from all pRFs within the ROI (Winawer et al., 2010). To compute  
200 visual field biases in individual participants and ROIs, we calculated the mean pRF sensitivity in  
201 the Ipsilateral and Contralateral visual fields, respectively.

202  
203  
204



## 205 *Statistical analyses*

206 Statistics were calculated using the R Studio package (version 1.3). For our analyses, we used  
207 repeated-measures ANOVAs to examine the presence of contralateral biases in the  
208 hippocampus. For each analysis, we established initially whether the ANOVA adhered to the  
209 assumptions of sphericity using Mauchly's test. When the assumption of sphericity was violated,  
210 the degrees of freedom for that main effect or interaction were corrected using the Greenhouse–  
211 Geisser correction to allow appropriate interpretation of the *F* value resulting from the ANOVA.

## 212 *HCP Retinotopy data*

214 To confirm the contralateral biases in the hippocampus, we turned to the 7.0 Tesla retinotopy data  
215 set collected as part of the HCP initiative (Benson et al., 2018). This data set comprises high-  
216 resolution retinotopic data (1.6mm isotropic) and a large sample size ( $n=181$ ). Full descriptions  
217 of this data set are provided elsewhere (Benson et al., 2018), but briefly, participants completed  
218 six retinotopic mapping runs (2x rotating wedge, 2x expanding ring 2x moving bar) in which the  
219 stimulus aperture presented a dynamic color texture (comprised of objects at different scales) on  
220 a pink noise background. Participants fixated centrally and indicated via button press when the  
221 fixation dot changed color. For consistency with our individual participant analyses we sampled  
222 the averaged data for the two bar runs only. Specifically, we sampled pRFs in the hippocampus  
223 from the group-averaged data derived by first computing the average time-course for each voxel  
224 across participants and, second, fitting the linear Gaussian pRF model to these group-averaged  
225 time-courses using custom python-based routines. Note that the pRF modelling implementation  
226 applied to the HCP data is different from that applied to the single participant data. Preprocessing  
227 on these data was identical to that used for the previous demonstration of retinotopic sensitivity  
228 within the default mode network (Szinte & Knäpen, 2020). A mask for the hippocampus was taken  
229 from the Harvard/Oxford probabilistic atlas (<https://fsl.fmrib.ox.ac.uk/fsl/fslwiki/Atlases>).

## 230 **Results**

232 We tested the hypothesis that the human hippocampus would exhibit a spatial bias for the  
233 contralateral visual field during visual field mapping (**Figure 1A**). Such a bias would mirror not  
234 only early visual cortex, but also, more anterior regions, such as medial parietal cortex and  
235 parahippocampal cortex that provide input to the hippocampus both directly and indirectly.

## 236 ***Biased representation of contralateral space in the hippocampus***

238 Initially, we computed visual field coverage plots in each participant and ROI (left hippocampus,  
239 right hippocampus) from all suprathreshold pRFs ( $R^2 \geq 0.1$ ), before averaging these coverage  
240 plots across participants. These visual field coverage plots represent schematic visualizations of  
241 the sensitivity of a given brain region to different positions in the visual field, built by combining  
242 the best Gaussian receptive field model (position, size and explained variance) for each voxel  
243 within an ROI. In our analyses, a max operator is used. This creates a coverage plot that reflects,  
244 at each point in the visual field, the maximum sensitivity (which we refer to as pRF value) from all  
245 of the receptive field models within an ROI (min=0, max=1) Thus, the coverage plot reflects the  
246 maximum envelope of all the pRFs.

248 The group average visual field coverage plots for the left and right hippocampus (**Figure 1B**)  
249 demonstrate a striking contralateral bias for both hemispheres, respectively. From the average  
250 coverage plots alone, there is no clear evidence of any quadrant biases but note the numerically  
251 higher percentages of pRF centers in the upper visual field (**inset Figure 1B**).

252 To quantify these contralateral biases, we calculated the mean pRF value (see above) in the  
253 ipsilateral and contralateral visual field in each participant and ROI, respectively, and submitted  
254 these to a two-way repeated measures ANOVA with Hemisphere (Left, Right) and Visual Field

255 (Ipsilateral, Contralateral) as within-participant factors. The main effects of Hemisphere ( $F_{(1, 26)} =$   
 256  $6.98, p=0.02$ , partial  $\eta^2=0.06$ ) and Visual field ( $F_{(1, 26)} = 21.44, p=8.89^{-5}$ , partial  $\eta^2=0.07$ ) were  
 257 significant, reflecting on average larger pRF values in the right over left hemisphere and the  
 258 contralateral over ipsilateral visual field, respectively. The Hemisphere by Visual Field interaction  
 259 was not significant ( $p>0.05$ ). A series of paired  $t$ -tests confirmed a significant contralateral bias in  
 260 both the left ( $t_{(26)}=2.50, p=0.01$ ) and right ( $t_{(26)}=3.22, p=0.003$ ) hippocampus (**Figure 1C**).

261

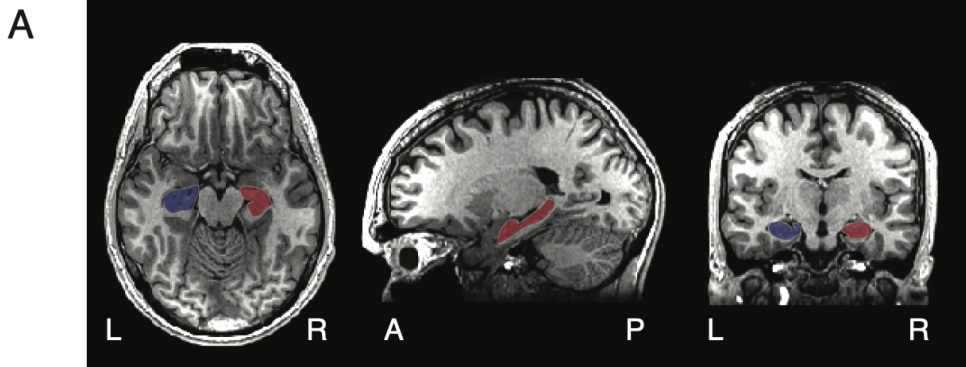

267

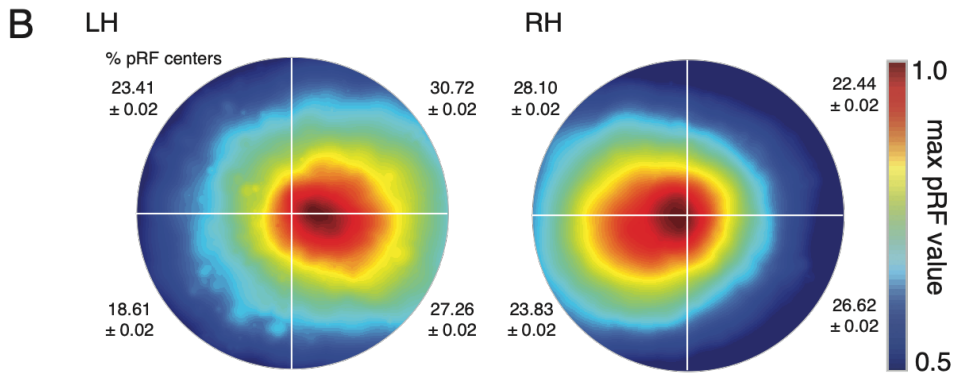

272

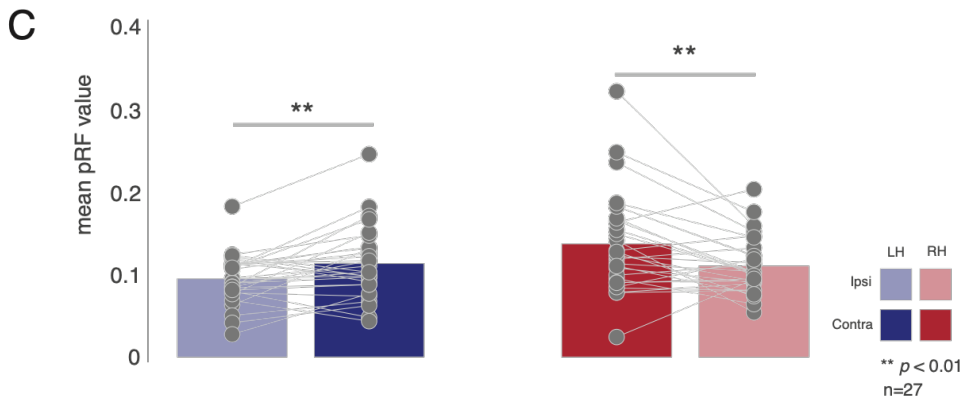

278

279 **Figure 1. Contralateral biases in human hippocampus. A,** Masks of the left (blue) and  
 280 right (red) hippocampus of a representative participant. Images are in neurological  
 281 convention. **B,** Group average ( $n=27$ ) visual field coverage plots derived from all  
 suprathreshold ( $R^2 \geq 0.1$ ) voxels. A clear contralateral bias is evident in bilateral  
 hippocampus. The mean percentage and standard deviation of pRF centers in each  
 quadrant is shown inset. **C,** Quantification of contralateral biases. Bars represent the  
 group-average pRF value in the ipsilateral (faded bars) and contralateral (solid bars)  
 visual fields. Individual participant values are plotted and linked for each hippocampus.  
 On average a significant contralateral bias was present in both hemispheres.  $**p<0.01$ .

## 282 **Retinotopic sensitivity and scene-selectivity in the hippocampus**

283 Given prior work suggesting a place for the hippocampus in the scene-processing network  
284 (Maguire & Mullally, 2013; Hodgetts et al., 2016), we next sought to establish the relationship  
285 between the strength of retinotopic encoding (variance explained by the pRF model) and the  
286 degree of scene-selectivity within the hippocampus. In each participant and hemisphere, we  
287 calculated the correlation (Pearson's) between the variance explained by each voxel's pRF fit and  
288 that voxel's corresponding index of scene-selectivity (*t-value* of the contrast Scenes versus Faces  
289 in a separate localizer task), before averaging correlation coefficients across participants. On  
290 average, a positive correlation was observed in each hemisphere, suggesting that the more  
291 retinotopically sensitive a voxel, the more scene-selective also (**Figure 2A**). A series of *t*-tests  
292 versus zero (i.e. no correlation) confirmed the significant positive correlation at the group level in  
293 both hemispheres (lh:  $t_{(26)}=3.88$ ,  $p=0.002$ , rh:  $t_{(26)}=3.23$ ,  $p=0.003$ ).

## 294 **Distribution of retinotopic sensitivity within the hippocampus**

295 Prior work suggests functional differences throughout the hippocampus, and a particularly  
296 common finding has been scene-selective responses in the medial (rather than lateral) aspect of  
297 anterior hippocampus (Zeidman & Maguire, 2016). To explore the spatial distribution of retinotopic  
298 sensitivity within the hippocampus, we sorted the voxel indices of each hippocampus first by the  
299 x-axis, which codes for left-right, and then by the y-axis, which codes for anterior-posterior within  
300 the brain. Next, we computed the correlation (Pearson's) between each voxel's position along  
301 that axis and the strength of retinotopic encoding (pRF explained variance), before averaging  
302 correlation coefficients across participants and testing against zero (i.e. no correlation) (**Figure**  
303 **2B**). In both hemispheres, there was a significant correlation between absolute x-position and  
304 retinotopic sensitivity (lh:  $t_{(26)}=2.41$ ,  $p=0.02$ , rh:  $t_{(26)}=2.26$ ,  $p=0.03$ ), reflecting better pRF model fits  
305 medially, as well as, significant negative correlations between y-position and retinotopic  
306 sensitivity, reflecting greater explained variance anteriorly (lh:  $t_{(26)}=7.52$ ,  $p=5.42^{-8}$ , rh:  $t_{(26)}=7.91$ ,  
307  $2.17^{-8}$ ).

308  
309 We next sought to establish whether a contralateral bias would be present in sub-sections of the  
310 hippocampus. Accordingly, we divided each participant's hippocampus into equal thirds along the  
311 y-axis (see methods). These were subsequently labelled as Anterior, Middle and Posterior  
312 sections (**Figure 2C**). The group average visual field coverage plots for each section are depicted  
313 for the left (**Figure 2D**) and right hippocampus (**Figure 2E**). At the group level, a clear contralateral  
314 bias is evident in the anterior and middle sections of both hemispheres, whereas the posterior  
315 sections exhibit no such bias.

316  
317 To quantify these biases, we computed the mean pRF value in both the ipsilateral and  
318 contralateral visual fields in each individual participant and ROI. These values were submitted to  
319 a three-way repeated measures ANOVA with Hemisphere (Left, Right), Section (Anterior, Middle,  
320 Posterior) and Visual Field (Ipsilateral, Contralateral) as within-participant factors. The main  
321 effects of Hemisphere ( $F_{(1, 26)}=8.75$ ,  $p=0.006$ , partial  $\eta^2=0.05$ ), Section ( $F_{(2, 52)}=23.49$ ,  $p=5.38^{-8}$ ,  
322 partial  $\eta^2=0.16$ ) and Visual Field ( $F_{(1, 26)}=20.14$ ,  $p=0.0001$ , partial  $\eta^2=0.02$ ), were significant,  
323 reflecting on average larger pRF values in the right hemisphere, in anterior and middle over  
324 posterior sections and in the contralateral over ipsilateral visual field, respectively. Only the  
325 Section by Visual field interaction ( $F_{(2, 52)}=5.75$ ,  $p=0.01$ , partial  $\eta^2=0.008$ , GG-corrected) was  
326 significant. All other interactions were not significant ( $p>0.05$ , in all cases).

327  
328 To explore this further, we conducted a series of two-way ANOVAs with Section and Visual Field  
329 as factors in each hemisphere separately. In the left hemisphere, only the main effect of Section  
330 ( $F_{(2, 52)}=25.58$ ,  $p=1.83^{-8}$ , partial  $\eta^2=0.21$ ) was significant ( $p>0.05$ , in all other cases). A series of  
331 paired *t*-tests revealed a significant contralateral bias in the middle ( $t_{(26)}=1.96$ ,  $p=0.02$ ), but not the  
332

333 anterior ( $t_{(26)}=1.61$ ,  $p=0.10$ ) or posterior sections ( $t_{(26)}=0.14$ ,  $p=0.44$ ), although note the  
 334 numerically larger contralateral bias in the anterior section (**Figure 2F**). In the right hemisphere,  
 335 both the main effects of Section ( $F_{(2, 52)}=11.28$ ,  $p=8.51^{-5}$ , partial  $\eta^2=0.12$ ) and Visual field ( $F_{(2, 52)}=9.99$ ,  $p=0.003$ , partial  $\eta^2=0.04$ ) were significant, as was their interaction ( $F_{(2, 52)}=5.52$ ,  $p=0.01$ , partial  $\eta^2=0.01$ , GG-corrected). Again, a series of paired  $t$ -tests revealed significant contralateral biases in both the anterior ( $t_{(26)}=4.00$ ,  $p=0.0004$ ) and middle ( $t_{(26)}=2.88$ ,  $p=0.007$ ), but not the posterior section ( $t_{(26)}=0.96$ ,  $p=0.34$ ) (**Figure 2G**).

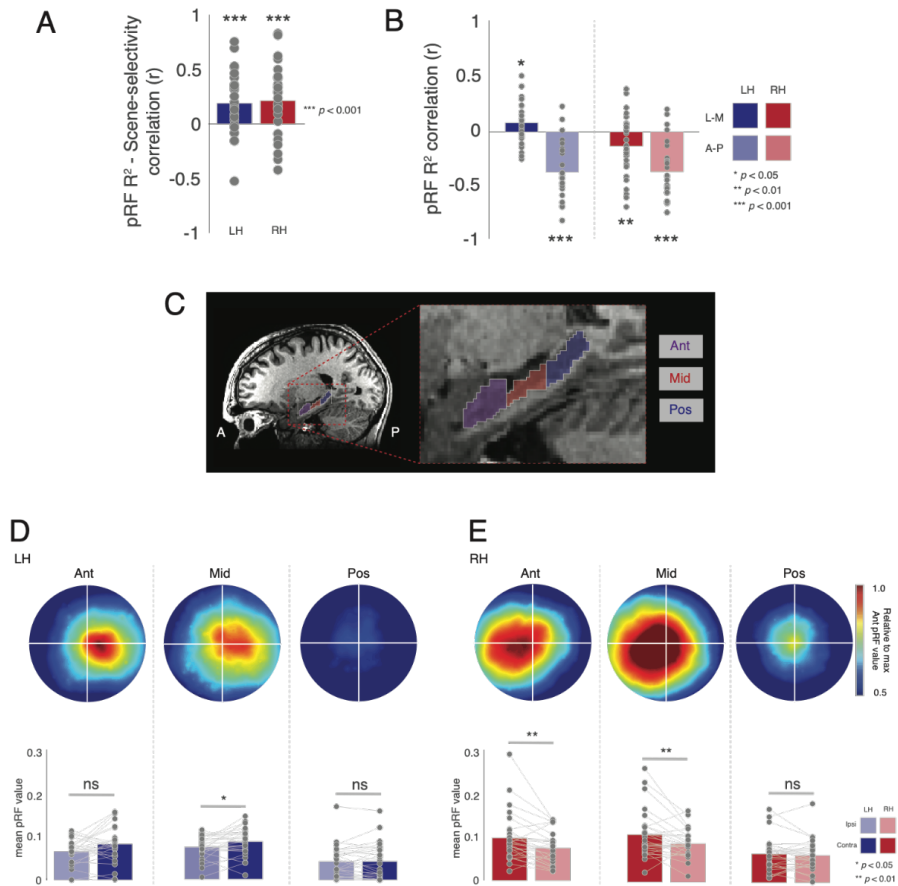

368 **Figure 2.** Relationship with scene-selectivity and contralateral biases in hippocampal sections. **A**, Bars  
 369 represent the group-average correlation (Pearson's) between pRF  $R^2$  and scene-selectivity across  
 370 voxels. **B**, Bars represent the group average correlation between pRF  $R^2$  and position along the lateral-  
 371 medial (solid bars) and anterior-posterior (faded bars) axes. **C**, Enlarged view of the hippocampus  
 372 showing the Anterior, Middle and Posterior sections. **D**, Group average visual field coverage plots  
 373 derived from all suprathreshold ( $R^2 > 0.1$ ) voxels in each hippocampal section. **D**, Bars represent the  
 374 group-average pRF value in the ipsilateral (faded bars) and contralateral (solid bars) visual fields for  
 375 each section in the left hippocampus. **E**, same as D but for the right hippocampus. \* $p < 0.05$ , \*\* $p < 0.01$ .

### 377 **Reduced signal posteriorly could explain lack of contralateral bias**

378 Whilst the data suggest that the strength of retinotopic sensitivity is reduced more posteriorly in  
 379 the hippocampus, it is important to consider the impact of signal strength on these patterns of  
 380 results. First, we calculated the temporal signal-to-noise (tSNR) of the pRF runs for each  
 381 participant. Next, we computed the median tSNR values in each section of the hippocampus and  
 382 submitted these values to a two-way repeated measures ANOVA with Hemisphere and Section  
 383 as factors (same levels as above). The main effect of Section was significant ( $F_{(2, 52)}=110.54$ ,



384  $p=1.54^{-13}$ , partial  $\eta^2=0.40$ , GG-corrected), reflecting larger tSNR values more anteriorly,  
385 whereas the main effect of Hemisphere and the Hemisphere by Section interaction were not  
386 significant ( $p>0.05$  in both cases). Given the non-significant effect of Hemisphere, tSNR values  
387 were averaged across hemispheres before being submitted to a one-way ANOVA with Section  
388 as the only factor. The main effect of Section was significant ( $F_{(2, 52)}=110.54$ ,  $p=1.54^{-13}$ , partial  
389  $\eta^2=0.43$ , GG-corrected). A series of paired  $t$ -tests confirmed that tSNR decreased significantly  
390 from anterior to posterior in the hippocampus (Anterior versus Middle:  $t_{(26)}=10.56$ ,  $p=6.65^{-11}$ ;  
391 Anterior versus Posterior:  $t_{(26)}=11.32$ ,  $p=1.49^{-11}$ ; Middle versus posterior:  $t_{(26)}=8.16$ ,  $p=1.19^{-8}$ ).

392

### 393 **Contralateral bias in hippocampus not due to spillover from PHG**

394 The hippocampus is located anterior and dorsal of the parahippocampal gyrus (PHG). Prior work  
395 from our group and others has demonstrated the strong influence of retinotopy in the  
396 parahippocampal gyrus and in the PPA in particular. Given the known proximity between the PHG  
397 and the hippocampus we sought to rule out the possibility that these retinotopically sensitive  
398 responses measured within the hippocampus were due to spillover of responses from PHG. In  
399 each participant, we examined the responses within the hippocampus with respect to those  
400 measured from PHG. The explained variance of the pRF model for a representative participant is  
401 shown in **Figure 3 (top)**. Whilst robust fits to the pRF model are evident in early visual cortex,  
402 extending anteriorly into ventral temporal cortex and encompassing the PPA, two small clusters  
403 of suprathreshold voxels are also evident within the hippocampus. These clusters, particularly the  
404 more anterior cluster, are spatially separated from responses in ventral temporal cortex and are  
405 unlikely to reflect spillover from PHG. Both clusters exhibit pRF centers located well within the  
406 contralateral visual field **Figure 3 (bottom)**.

407

408

409

410

411

412

413

414

415

416

417

418

419

420

421

422

423

424

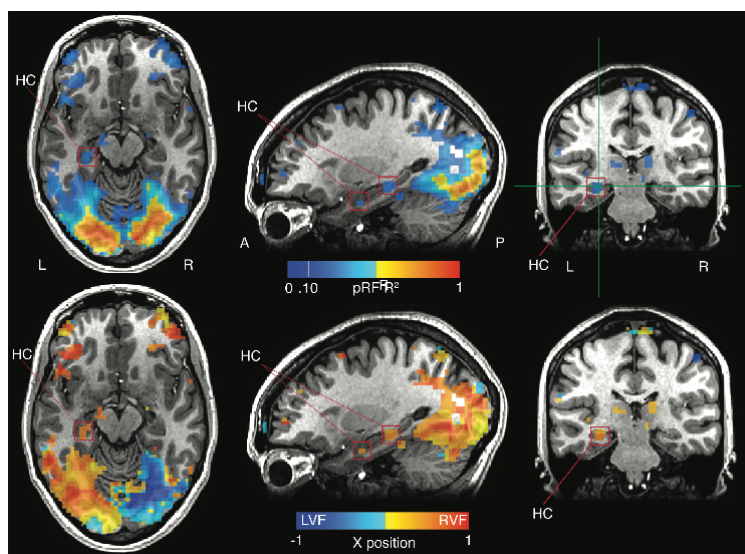

425

426

427

428

429

430

431

432

433

434

**Figure 3.** Retinotopic sensitivity in the hippocampus is spatially separate from PHG. **Top row,** The pRF  $R^2$  is overlaid onto axial, sagittal and coronal slices of a representative participant. Strong responses are evident throughout visual cortex and extend anteriorly in ventral temporal cortex. Two clusters within the hippocampus (red boxes) appear spatially distinct from more posterior responses in PHG. **Bottom row,** The x-position of pRF centers are overlaid onto the same slices. The two hippocampal clusters show pRF positions firmly in the contralateral (right) visual field.

### 432 **Replication of contralateral bias in a high-resolution independent dataset**

433 Our individual participant analyses demonstrate that, when considered as a single structure, the  
434 human hippocampus exhibits a significant bias for contralateral visual space when measured

435 through pRF mapping. We next sought to confirm these findings in independent data by taking  
436 advantage of the large sample ( $n=181$ ) and high-resolution (1.6mm isotropic) 7.0 Tesla retinotopy  
437 data collected as part of the HCP initiative (Benson et al., 2018).

438  
439 Using the group average pRF fitted data (from the bar runs only), we sampled pRF parameters  
440 ( $R^2$ , x-position, eccentricity and pRF size) from a mask of the hippocampus. Enlarged views of  
441 the hippocampus with each pRF parameter overlaid in false colour are shown in **Figure 4**. Many  
442 of the features present in the individual participant data are also evident here, despite these data  
443 being acquired across different scanners, fieldstrengths, resolutions and visual stimulus setups,  
444 while also being analysed using different processing pipelines. These data demonstrate **a)** that  
445 voxels are fit well by the pRF model throughout the hippocampus, with clear clusters evident in  
446 anterior medial sections (**Figure 4A**), **b)** hippocampal pRFs exhibit largely contralateral visual  
447 field centers (**Figure 4B**), **c)** pRFs are relatively eccentric with few representing the fovea and **d)**  
448 pRFs range in size but with very few small pRFs. For completeness, we calculated the visual field  
449 coverage in each hemisphere from all suprathreshold pRFs ( $R^2 > 0.1$ ) from the HCP data. In both  
450 hemispheres, a clear contralateral bias is evident (**Figure 4E**). Again, there is no clear evidence  
451 for any quadrant biases but note that unlike our individual participant analyses the HCP data  
452 contains a higher percentage of lower visual field centers (percentage of pRF centers inset).  
453 These data complement the individual participant analyses reported above and highlight the  
454 contralateral bias exhibited by the human hippocampus during visual field mapping.

455

456

457

458

459

460

461

462

463

464

465

466

467

468

469

470

471

472

473

474

475

476

477

478

479

480

481

482

483

484

485

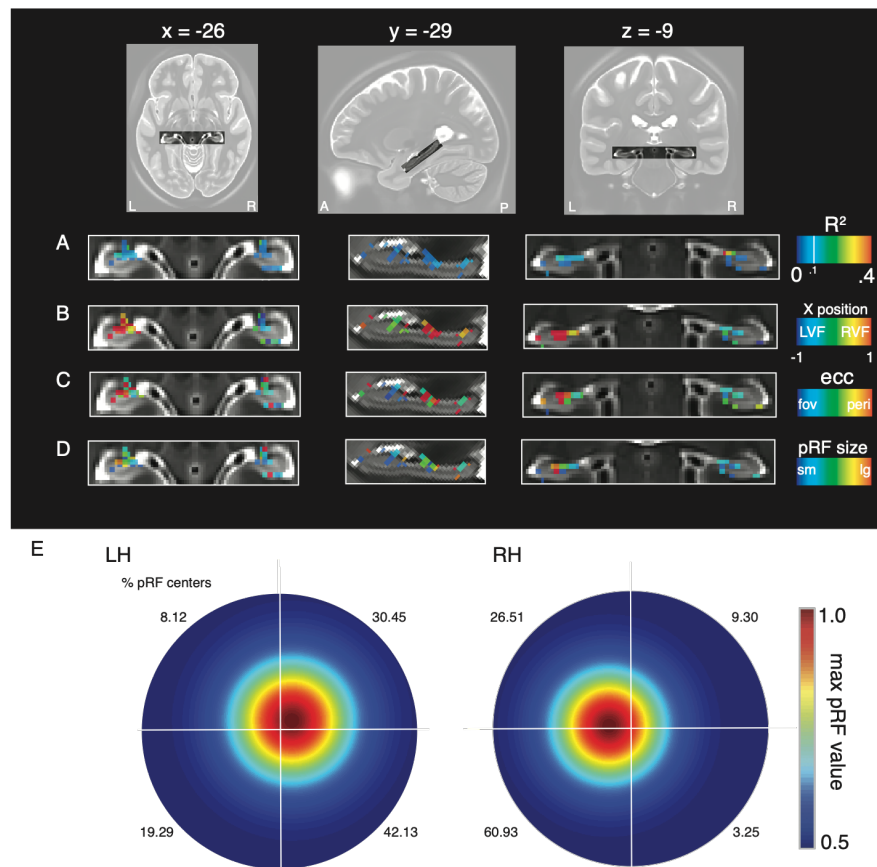

**Figure 4.** pRF parameters in the hippocampus from the HCP data. **A**, Enlarged axial, sagittal and coronal views of the hippocampus shown with the pRF  $R^2$  overlaid. Voxels in the hippocampus are well fitted by the pRF model, with clusters in anterior medial portions. **B**, The x-position of pRFs is shown. In general, pRFs show largely contralateral visual field positions. **C**, pRF eccentricity suggests peripheral pRFs in the hippocampus. **D**, Hippocampal pRFs appear also to be large. **E**, Visual field coverage from all suprathreshold pRFs ( $R^2 > 0.1$ ; left = 199, right = 115). A contralateral bias is present in bilateral hippocampus. The percentage of pRF centers in each quadrant are inset.

## 486 **Discussion**

487 Here, using pRF data from two independent sources we demonstrate a consistent contralateral  
488 bias in the human hippocampus during visual field mapping. These data demonstrate that the  
489 influence of retinotopy is present and measurable even at the very highest level of the visual  
490 hierarchy (Felleman and Van Essen, 1991; Kravitz et al., 2011; 2013) and suggests that retinotopy  
491 be considered as a visuospatial representation that is available to the hippocampus.

492

### 493 ***Anatomical connectivity with the hippocampus implies retinotopic sensitivity***

494 A contralateral bias of visual space was implied by direct and indirect connections between the  
495 hippocampus and antecedent regions of the visual hierarchy. Tract-tracing studies in non-human  
496 primates positioned the hippocampus at the highest-level in the visual hierarchy (Felleman and  
497 Van Essen, 1991). The regions with which it is connected are responsive to visual stimuli, with  
498 early neurophysiological studies identifying visually responsive units in parahippocampal  
499 structures in non-human primates (Maclean et al., 1968; Desimone & Gross., 1979) and humans  
500 (Wilson et al., 1983). More recently, functional neuroimaging has demonstrated contralateral  
501 population receptive fields in multiple regions thought to connect directly and/or indirectly with the  
502 hippocampus (Silson et al., 2015). Specifically, contralateral biases have been reported in scene-  
503 selective PPA, OPA and MPA – located on the ventral, lateral and medial surfaces, respectively  
504 (Silson et al., 2015; 2016).

505

506 We found that retinotopic population receptive fields were detectable in the human hippocampus,  
507 lateralized to each contralateral hemisphere, using two independent datasets with distinct stimuli.  
508 We did not find any evidence for a systematic mapping of visual space in the hippocampus - a  
509 hallmark of early visual cortex. However, the absence of a retinotopic map should not imply the  
510 absence of retinotopic sensitivity. Indeed, prior work from our group (Silson et al., 2015; 2016)  
511 and others (Eishout et al., 2018) has demonstrated robust and reliable retinotopically driven  
512 responses in occipitotemporal and medial parietal cortices without clear evidence for  
513 accompanying retinotopic maps. Moreover, this could be due to technical limitations: given the  
514 organizational scale of the hippocampus relative to current fMRI voxel sizes it is possible that  
515 finding map-like organization in hippocampus requires using even smaller fMRI voxels. The  
516 coarse representation of contralateral visual space reported here is consistent with a very recent  
517 study employing ultra-high resolution and connective field modelling to demonstrate fine-grained  
518 visuotopic connectivity between V1 and the hippocampus (Knapen, 2020). The question of  
519 whether the contralateral biases reported here (and elsewhere, Knapen, 2020) reflect retinotopic  
520 inputs into the hippocampus or retinotopic neurons within the hippocampus itself cannot be  
521 answered by the current fMRI data, but remains an important and open question for future  
522 research.

523

### 524 ***Distribution of retinotopic sensitivity across the hippocampus***

525 Studies of visual scene perception and discrimination have highlighted the potentially key role  
526 played by the anterior medial portion of the hippocampus (Hogetts et al., 2016; Zeidman and  
527 Maguire, 2016). Our results were consistent with this. Not only did we observe, on average, a  
528 significant positive correlation between retinotopic sensitivity and medial – lateral position within  
529 the hippocampus, but also, a significant negative correlation between retinotopic sensitivity and  
530 anterior-posterior position. Subsequent analyses of separate hippocampal sections also  
531 suggested more prominent retinotopic sensitivity anteriorly, but these are to be interpreted with  
532 caution as follow-up analyses also revealed that tSNR drops systematically in more posterior  
533 regions.

534

535 Our data demonstrated a significant positive relationship between retinotopic sensitivity and  
536 scene-selectivity, suggesting that the well-established preferential response of the hippocampus

537 to scene stimuli involves processing in retinotopic space. Interestingly, similar positive  
538 relationships between scene-selectivity and retinotopy have been reported within scene-selective  
539 MPA in medial parietal cortex (Silson et al., 2016), which is thought to provide input to the  
540 hippocampus (Margulies et al., 2009; Kravitz et al., 2011).

541  
542 **Visuospatial encoding in the hippocampus**  
543 What information might the hippocampus be encoding or processing? The hippocampus directly  
544 encodes an animal's spatial location in an allocentric (world-centered) reference frame (O'Keefe,  
545 and Dostrovsky, 1971). Visual input contributes to the formation of these representations (Chen  
546 et al., 2013), and indeed, recent findings have demonstrated that neuronal populations in both  
547 CA1 and V1 encode the rodent's subjective estimate of its position along a linear track (Saleem  
548 et al., 2018). However, to our knowledge, retinotopy has never been identified in the rodent  
549 hippocampus, which may be unsurprising given their large, overlapping visual fields and relatively  
550 poor visual acuity.

551  
552 There is increasing evidence that primate hippocampus and entorhinal cortex encode not only  
553 physical location, but also *visual space* in multiple reference frames (Miester, 2018; Rolls and  
554 Wirth, 2018; Zeidman and Maguire, 2016; Nau et al., 2018). In brief, primate *spatial view cells*  
555 were found to encode positions on a video screen, or the position of the video screen in the room  
556 (Feigenbaum and Rolls, 1991; Georges-François, Rolls & Robertson, 1999). More recently,  
557 entorhinal grid cells (Hafting et al., 2005) have been found to have firing fields covering gaze  
558 direction or visual space in non-human primates (Killian et al., 2012; Wilming et al., 2018) and in  
559 humans (Nau et al., 2018; Julian et al., 2018). Our results demonstrate that retinotopy  
560 complements these other visuospatial representations in the hippocampus.

561  
562 **Functional significance of multiple visuospatial representations**  
563 What functions might be served by the presence of multiple visuospatial representations in the  
564 hippocampus? Insights may be gained from neuropsychological studies on patients with specific  
565 lesions to the hippocampus. Such patients have been found to be impaired at discriminating  
566 images of similar three-dimensional scenes, or scenes from different viewpoints (Lee et al., 2005;  
567 2005; Aly et al., 2013; Suzuki et al., 2009; Baxter et al., 2009) and they are impaired at  
568 extrapolating beyond the view (Mullally et al., 2012). Thus, the hippocampus may be required for  
569 complex visual tasks, which require forming an internal representation or model of the stimuli. Our  
570 results suggest this may be subserved by conjunctive retinotopic and allocentric representations  
571 in the hippocampus.

572  
573 Neuropsychological theories have been proposed to explain these findings in patients. In  
574 particular, *scene construction theory* (Hassabis et al., 2007) proposes that the hippocampus and  
575 connected regions form internal models of scenes, facilitating cognitive functions including vision,  
576 navigation, imagination and episodic memory (Ziedmann & Maguire, 2013). Under this account,  
577 the hippocampus could be considered a node in the scene-processing network (Maguire &  
578 Mullally, 2013; Hodgetts et al., 2016), that is functionally connected to antecedent scene-selective  
579 regions (Margulies et al., 2009; Silson et al., 2016) and these regions exhibit prominent biases for  
580 contralateral visual space (Silson et al., 2015). Thus, the left hippocampus may contribute  
581 information from the right visual field to the formation of a scene representation, and vice versa.  
582 Our initial pRF modelling employed scene stimuli whereby multiple scene fragments were  
583 presented at each location. Whilst this paradigm was used to try and prevent participants from  
584 mentally 'filling-in' the scenes, it is possible that scene fragments were namable and generated  
585 internal representations. On the other hand, the stimulus employed under the HCP initiative  
586 (Benson et al., 2018) could be considered far more abstract (objects at multiple scales on a pink-  
587 noise background).



588 An alternative perspective on hemifield-specific responses recognizes that the hippocampus  
589 guides behaviour, and this behaviour may include eye movements. The level of hippocampus  
590 activity has been found to correlate with the number of fixations when novel face images are  
591 presented, suggesting a role for the hippocampus in sampling information (Liu et al., 2017). A  
592 recent proposal, the *spatiotemporal similarity hypothesis*, explains this by suggesting that the  
593 hippocampus represents stimuli that co-occur in space and time, and it uses these joint  
594 representations to generate visual predictions and guide eye movements (Turk-Browne, 2019).  
595 *Predictive coding* is a computational framework which formalizes these notions and comes in  
596 multiple forms. Particularly relevant is *active inference* (Friston et al., 2015), which treats the brain  
597 as a deep hierarchical forward model that predicts sensory information and infers the causes of  
598 sensations by taking actions (such as sampling new information). Under this account, the purpose  
599 of a visual saccade is to test a hypothesis (i.e., reduce uncertainty) about what might be ‘out there’  
600 beyond the current view (Parr and Friston, 2018). The contribution of the hippocampus is  
601 proposed to be encoding transitions between discrete states, such as sequences of eye gaze  
602 positions (Mirza et al., 2016). Our results might suggest that left hippocampus encodes potential  
603 sequences of eye movements related to the right visual field, and vice versa (although in the tasks  
604 we present here, any such motor plans could not be enacted, as subjects were required to fixate  
605 centrally).

606  
607 Finally, the hippocampus may also encode temporal regularities, sequences or transition  
608 probabilities in the environment (Stachenfeld et al., 2017; Kumaran et al., 2006; Garvert et al.,  
609 2017). The pRF stimuli were highly predictable, traversing gradually on a predetermined trajectory  
610 through the visual field. It is therefore possible that the responses were elicited by predictions  
611 related to the sequence of stimuli in the contralateral visual field. An interesting future experiment  
612 could test this hypothesis by manipulating the predictability of the retinotopic mapping stimuli and  
613 measuring its impact on the contralateral biases measured as a result.

## 614 **Conclusion**

615 Taken together, our data highlight that retinotopic sensitivity, and the contralateral encoding of  
616 visual information in particular, is present even at the level of the human hippocampus. Whether  
617 such sensitivity reflects retinotopic input or the activity of retinotopic neurons in the hippocampus  
618 remains unclear. Likewise, how the hippocampus incorporates this retinotopic information with  
619 the allocentric and global spatial representations that the hippocampus supports is an important  
620 goal of future work, but it is possible that such a representation provides a means for the  
621 hippocampus to compare ongoing sensory inputs with past events. Indeed, the seemingly  
622 ubiquitous encoding of retinotopic information within brain regions that subserve divergent  
623 functions suggests the brain may utilize retinotopy as a means to facilitate neural communication.

## 624 **References**

- 625  
626 Aggleton, J.P. (2012). Multiple anatomical systems embedded within the primate medial temporal  
627 lobe: Implications for hippocampal function. *Neurosci Biobehav R* 36, 1579-1596.  
628  
629 Aly, M., Ranganath, C., and Yonelinas, A.P. (2013). Detecting Changes in Scenes: The  
630 Hippocampus Is Critical for Strength-Based Perception. *Neuron* 78, 1127-1137.  
631  
632 Battaglia, F.P., Sutherland, G.R., and McNaughton, B.L. (2004). Local sensory cues and place  
633 cell directionality: additional evidence of prospective coding in the hippocampus. *Journal of*  
634 *Neuroscience* 24, 4541-4550.  
635  
636 Baxter, M.G. (2009). Involvement of medial temporal lobe structures in memory and perception.  
637 *Neuron* 61, 667-677.  
638

- 639 Bender, F., Gorbati, M., Cadavieco, M.C., Denisova, N., Gao, X., Holman, C., Korotkova, T., and  
640 Ponomarenko, A. (2015). Theta oscillations regulate the speed of locomotion via a hippocampus  
641 to lateral septum pathway. *Nature communications* 6, 1-11.  
642
- 643 Benson, N. C., Jamison, K. W., Arcaro, M. J., Vu, A. T., Glasser, M. F., Coalson, T. S., ... & Kay,  
644 K. (2018). The Human Connectome Project 7 Tesla retinotopy dataset: Description and  
645 population receptive field analysis. *Journal of vision*, 18(13), 23-23.  
646
- 647 Chan, A. W., Kravitz, D. J., Truong, S., Arizpe, J., & Baker, C. I. (2010). Cortical representations  
648 of bodies and faces are strongest in commonly experienced configurations. *Nature*  
649 *neuroscience*, 13(4), 417-418.  
650
- 651 Chen, G., King, J.A., Burgess, N. and O'Keefe, J., 2013. How vision and movement combine in  
652 the hippocampal place code. *Proceedings of the National Academy of Sciences*, 110(1), pp.378-  
653 383.  
654
- 655 Desimone, R., & Gross, C. G. (1979). Visual areas in the temporal cortex of the macaque. *Brain*  
656 *research*, 178(2-3), 363-380.  
657
- 658 Ding, S.L. (2013). Comparative anatomy of the prosubiculum, subiculum, presubiculum,  
659 postsubiculum, and parasubiculum in human, monkey, and rodent. *The Journal of comparative*  
660 *neurology* 521, 4145-4162.  
661
- 662 Dumoulin, S. O., & Wandell, B. A. (2008). Population receptive field estimates in human visual  
663 cortex. *Neuroimage*, 39(2), 647-660.  
664
- 665 Elshout, J. A., van den Berg, A. V., & Haak, K. V. (2018). Human V2A: A map of the peripheral  
666 visual hemifield with functional connections to scene-selective cortex. *Journal of vision*, 18(9),  
667 22-22.  
668
- 669 Epstein, R., & Kanwisher, N. (1998). A cortical representation of the local visual  
670 environment. *Nature*, 392(6676), 598-601.  
671
- 672 Felleman, D.J., and Van, D.E. (1991). Distributed hierarchical processing in the primate cerebral  
673 cortex. *Cerebral cortex (New York, NY: 1991)* 1, 1-47.  
674
- 675 Feigenbaum, J.D., and Rolls, E.T. (1991). Allocentric and egocentric spatial information  
676 processing in the hippocampal formation of the behaving primate. *Psychobiology* 19, 21-40.  
677
- 678 Friston, K., Rigoli, F., Ognibene, D., Mathys, C., Fitzgerald, T., and Pezzulo, G. (2015). Active  
679 inference and epistemic value. *Cognitive neuroscience* 6, 187-214.  
680
- 681 Garvert, M.M., Dolan, R.J., and Behrens, T.E. (2017). A map of abstract relational knowledge in  
682 the human hippocampal–entorhinal cortex. *Elife* 6, e17086.  
683
- 684 Georges-François, P., Rolls, E.T., and Robertson, R.G. (1999). Spatial view cells in the primate  
685 hippocampus: allocentric view not head direction or eye position or place. *Cerebral cortex* 9, 197-  
686 212.  
687

- 688 Groen, I. I., Silson, E. H., & Baker, C. I. (2017). Contributions of low-and high-level properties to  
689 neural processing of visual scenes in the human brain. *Philosophical Transactions of the Royal*  
690 *Society B: Biological Sciences*, 372(1714), 20160102.  
691
- 692 Hafting, T., Fyhn, M., Molden, S., Moser, M.-B., and Moser, E.I. (2005). Microstructure of a spatial  
693 map in the entorhinal cortex. *Nature* 436, 801-806.  
694
- 695 Hassabis, D., and Maguire, E.A. (2007). Deconstructing episodic memory with construction.  
696 *Trends in cognitive sciences* 11, 299-306.  
697
- 698 Hemond, C. C., Kanwisher, N. G., & De Beeck, H. P. O. (2007). A preference for contralateral  
699 stimuli in human object-and face-selective cortex. *PLoS one*, 2(6).  
700
- 701 Hodgetts, C. J., Shine, J. P., Lawrence, A. D., Downing, P. E., & Graham, K. S. (2016). Evidencing  
702 a place for the hippocampus within the core scene processing network. *Human brain*  
703 *mapping*, 37(11), 3779-379.  
704
- 705 Huang, R.-S., and Sereno, M.I. (2013). Bottom-up retinotopic organization supports top-down  
706 mental imagery. *The open neuroimaging journal* 7, 58.  
707
- 708 Jeye, B. M., MacEvoy, S. P., Karanian, J. M., & Slotnick, S. D. (2018). Distinct regions of the  
709 hippocampus are associated with memory for different spatial locations. *Brain research*, 1687,  
710 41-49.  
711
- 712 Julian, J.B., Keinath, A.T., Frazzetta, G., and Epstein, R.A. (2018). Human entorhinal cortex  
713 represents visual space using a boundary-anchored grid. *Nature neuroscience* 21, 191-194.  
714
- 715 Johnson, A., and Redish, A.D. (2007). Neural ensembles in CA3 transiently encode paths forward  
716 of the animal at a decision point. *Journal of Neuroscience* 27, 12176-12189.  
717
- 718 Kanwisher, N., McDermott, J., & Chun, M. M. (1997). The fusiform face area: a module in human  
719 extrastriate cortex specialized for face perception. *Journal of neuroscience*, 17(11), 4302-4311.  
720
- 721 Killian, N.J., Jutras, M.J., and Buffalo, E.A. (2012). A map of visual space in the primate entorhinal  
722 cortex. *Nature* 491, 761-764.  
723
- 724 Kravitz, D. J., Kriegeskorte, N., & Baker, C. I. (2010). High-level visual object representations are  
725 constrained by position. *Cerebral Cortex*, 20(12), 2916-2925.  
726
- 727 Kravitz, D. J., Saleem, K. S., Baker, C. I., & Mishkin, M. (2011). A new neural framework for  
728 visuospatial processing. *Nature Reviews Neuroscience*, 12(4), 217-230.  
729
- 730 Kravitz, D. J., Saleem, K. S., Baker, C. I., Ungerleider, L. G., & Mishkin, M. (2013). The ventral  
731 visual pathway: an expanded neural framework for the processing of object quality. *Trends in*  
732 *cognitive sciences*, 17(1), 26-49.  
733
- 734 Kumaran, D., and Maguire, E.A. (2006). An unexpected sequence of events: mismatch detection  
735 in the human hippocampus. *PLoS biology* 4.  
736

- 737 Lee, A.C.H., Buckley, M.J., Pegman, S.J., Spiers, H., Scahill, V.L., Gaffan, D., Bussey, T.J.,  
738 Davies, R.R., Kapur, N., Hodges, J.R., et al. (2005). Specialization in the medial temporal lobe  
739 for processing of objects and scenes. *Hippocampus* 15, 782-797.  
740
- 741 Lee, A.C.H., Bussey, T.J., Murray, E.A., Saksida, L.M., Epstein, R.A., Kapur, N., Jr, H., and  
742 Graham, K.S. (2005). Perceptual deficits in amnesia: challenging the medial temporal lobe  
743 'mnemonic' view. *Neuropsychologia* 43, 1-11.  
744
- 745 Liu, Z.X., Shen, K., Olsen, R.K. and Ryan, J.D., 2017. Visual sampling predicts hippocampal  
746 activity. *Journal of Neuroscience*, 37(3), pp.599-609.  
747
- 748 MacLean, P. D., Yokota, Toshikatsu., & Kinnard, M. A. (1968). Photically sustained on-responses  
749 of units in posterior hippocampal gyrus of awake monkey. *Journal of neurophysiology*, 31(6), 870-  
750 883.  
751
- 752 Mackey, W. E., Winawer, J., & Curtis, C. E. (2017). Visual field map clusters in human  
753 frontoparietal cortex. *Elife*, 6, e22974.  
754
- 755 Maguire, E.A. and Mullally, S.L., 2013. The hippocampus: a manifesto for change. *Journal of*  
756 *Experimental Psychology: General*, 142(4), p.1180.  
757
- 758 Malcolm, G. L., Groen, I. I., & Baker, C. I. (2016). Making sense of real-world scenes. *Trends in*  
759 *Cognitive Sciences*, 20(11), 843-856.  
760
- 761 Meister, M. (2018). Memory system neurons represent gaze position and the visual world. *Journal*  
762 *of experimental neuroscience* 12, 1179069518787484.  
763
- 764 Mirza, M.B., Adams, R.A., Mathys, C.D., and Friston, K.J. (2016). Scene construction, visual  
765 foraging, and active inference. *Frontiers in computational neuroscience* 10, 56.  
766
- 767 Momennejad, I., Russek, E.M., Cheong, J.H., Botvinick, M.M., Daw, N.D., and Gershman, S.J.  
768 (2017). The successor representation in human reinforcement learning. *Nature Human Behaviour*  
769 1, 680-692.  
770
- 771 Mullally, S.L., Intraub, H., and Maguire, E.A. (2012). Attenuated Boundary Extension Produces a  
772 Paradoxical Memory Advantage in Amnesic Patients. *Current Biology* 22, 261-268.  
773
- 774 Nau, M., Julian, J. B., & Doeller, C. F. (2018). How the brain's navigation system shapes our  
775 visual experience. *Trends in cognitive sciences*, 22(9), 810-825.  
776
- 777 Nau, M., Schröder, T.N., Bellmund, J.L., and Doeller, C.F. (2018). Hexadirectional coding of visual  
778 space in human entorhinal cortex. *Nature neuroscience* 21, 188-190.  
779
- 780 O'Keefe, J., and Dostrovsky, J. (1971). The hippocampus as a spatial map. Preliminary evidence  
781 from unit activity in the freely-moving rat. *Brain research* 34, 171-175.  
782
- 783 Parr, T., and Friston, K.J. (2018). The discrete and continuous brain: from decisions to  
784 movement—and back again. *Neural Comput* 30, 2319-2347.  
785
- 786 Poppenk, J., Evensmoen, H. R., Moscovitch, M., & Nadel, L. (2013). Long-axis specialization of  
787 the human hippocampus. *Trends in cognitive sciences*, 17(5), 230-240.



788  
789 Race, E., Keane, M.M., and Verfaellie, M. (2011). Medial Temporal Lobe Damage Causes Deficits  
790 in Episodic Memory and Episodic Future Thinking Not Attributable to Deficits in Narrative  
791 Construction. *The Journal of Neuroscience* 31, 10262-10269.  
792  
793 Rolls, E.T., and Wirth, S. (2018). Spatial representations in the primate hippocampus, and their  
794 functions in memory and navigation. *Prog Neurobiol* 171, 90-113.  
795  
796 Saleem, A.B., Diamanti, E.M., Fournier, J., Harris, K.D., and Carandini, M. (2018). Coherent  
797 encoding of subjective spatial position in visual cortex and hippocampus. *Nature* 562, 124-127.  
798  
799 Silson, E.H., Chan, A.W.-Y., Reynolds, R.C., Kravitz, D.J., and Baker, C.I. (2015). A retinotopic  
800 basis for the division of high-level scene processing between lateral and ventral human  
801 occipitotemporal cortex. *Journal of Neuroscience* 35, 11921-11935.  
802  
803 Silson, E.H., Steel, A.D., and Baker, C.I. (2016). Scene-selectivity and retinotopy in medial  
804 parietal cortex. *Frontiers in human neuroscience* 10, 412.  
805  
806 Silver, M. A., & Kastner, S. (2009). Topographic maps in human frontal and parietal cortex. *Trends*  
807 *in cognitive sciences*, 13(11), 488-495.  
808  
809 Stachenfeld, K.L., Botvinick, M.M., and Gershman, S.J. (2017). The hippocampus as a predictive  
810 map. *Nature neuroscience* 20, 1643.  
811  
812 Suzuki, W.A. (2009). Perception and the Medial Temporal Lobe: Evaluating the Current Evidence.  
813 *Neuron* 61, 657-666.  
814  
815 Swisher, J. D., Halko, M. A., Merabet, L. B., McMains, S. A., & Somers, D. C. (2007). Visual  
816 topography of human intraparietal sulcus. *Journal of Neuroscience*, 27(20), 5326-5337.  
817  
818 Szinte, M., & Knapen, T. (2020). Visual Organization of the Default Network. *Cerebral*  
819 *Cortex*, 30(6), 3518-3527.  
820  
821 Turk-Browne, N. B. (2019). The hippocampus as a visual area organized by space and time: A  
822 spatiotemporal similarity hypothesis. *Vision research*, 165, 123-130.  
823  
824 Van Es, D. M., Van Der Zwaag, W., & Knapen, T. (2019). Topographic maps of visual space in  
825 the human cerebellum. *Current Biology*, 29(10), 1689-1694.  
826  
827 Wandell, B. A., Dumoulin, S. O., & Brewer, A. A. (2007). Visual field maps in human  
828 cortex. *Neuron*, 56(2), 366-383.  
829  
830 Wilming, N., König, P., König, S., & Buffalo, E. A. (2018). Entorhinal cortex receptive fields are  
831 modulated by spatial attention, even without movement. *Elife*, 7, e31745.  
832  
833 Wilson, C. L., Babb, T. L., Halgren, E., & Crandall, P. H. (1983). Visual receptive fields and  
834 response properties of neurons in human temporal lobe and visual pathways. *Brain*, 106(2), 473-  
835 502.  
836  
837 Zeidman, P., and Maguire, E.A. (2016). Anterior hippocampus: the anatomy of perception,  
838 imagination and episodic memory. *Nature Reviews Neuroscience* 17, 1
